# Supplementary material
Source: PubMed Central journal article supplement (PMC3219103)
Supplement: 1106676108_pnas.201106676SI.pdf [file 1106676108_pnas.201106676SI.pdf]

# Supporting Information

Klenov et al. 10.1073/pnas.1106676108

## SI Materials and Methods

**Drosophila melanogaster Mutant Strains.** The following mutant flies were used: *piwi*<sup>2</sup> and *piwi*<sup>3</sup> (1); *spn-E*<sup>1</sup> and *spn-E*<sup>1</sup>/*spn-E*<sup>chs3987</sup> (2, 3); *armi*<sup>72.1</sup> and *armi*<sup>1</sup> (4); *aub*<sup>QC42</sup>/*aub*<sup>HN</sup> (5); *mael*<sup>20</sup> (6), *mael*<sup>EY08554</sup>, and *mael*<sup>20</sup>/*mael*<sup>EY08554</sup> transheterozygotes; *zuc*<sup>HM27</sup>/*zuc*<sup>[DTS513]</sup> (7).

**Molecular Characterization of *piwi*<sup>Nt</sup> Mutation.** For RT-PCR analysis of the *piwi*<sup>Nt</sup> transcript the following primer pairs were used: 1, forward, ACTGAGTCCAAAGCGTCGTT and 1, reverse, GCATGATTGGACAAAACCTCC, 2, forward, CCGAGCATC-GAGAATCCT and 2, reverse, AAGTCCAAAACATTTAC-CCG, 3, forward, CGACGTTGCTCACACAATC and 3, reverse, TGTTCTGCTGTCCAATTATC, 4, forward, TGGACA-AGAACGTCACAGAA and 4, reverse, TTCAGTTGGATT-GCTATTTTG, 5, forward, ACGACCAAGAACCGTAGC and 5, reverse, TGTCGTTGAGGAAGAAGC, 6, forward, TAT-TATTGTGGTAACCAGATCCAT and 6, reverse, TTTAGT-CATAAATGCTGAAGTG. All these primers except 1 forward and reverse revealed in mutant ovaries the presence of the *piwi* transcript with the same sequence as WT *piwi*. 1 forward and reverse primers corresponding to the *piwi* 5' end detected no product in both RT-PCR and genome DNA PCR of *piwi*<sup>Nt</sup> mutant. 5'-RACE of *piwi*<sup>Nt</sup> transcript was performed by using the 5'-RACE System for Rapid Amplification of cDNA Ends kit (Invitrogen) according to the manufacturer's instructions. For the first PCR, AAP-GGCCACGCGTGCAGTACGGG-GGGGGG and *piwi* rev-GCAACGTCGCATTATGTCGTA primers were used. Obtained amplicon was used for nested PCR with primers AUAP-GGCCACGCGTGCAGTAC and *piwi* rev. Sequencing of PCR product was done using primers *piwi* rev and 1 reverse (as detailed earlier). 5'-RACE revealed that *piwi*<sup>Nt</sup> transcription start corresponds to the first intron of the *piwi* gene in position +1191 according to GenBank sequence NG000285. Predicted start of *piwi*<sup>Nt</sup> protein coding sequence corresponds to the position +1283 of NG000285. The result of 5'-RACE was confirmed by RT-PCR by using primers located close to *piwi*<sup>Nt</sup> transcription start site. *piwi*<sup>Nt</sup> transcript was detected by primer pair *p3* GCAGTCATTCACTTCTATTAGGA/1 reverse, but not by primers *p4* GTTGAGTCTTCTGGTGTATTG/1 reverse located around the *piwi*<sup>Nt</sup> transcription start site. The cryptic promoter in this region was predicted using the McPromoter software (<http://tools.igsp.duke.edu/generegulation/McPromoter/>).

Site of P element construct insertion in the mutant *piwi*<sup>Nt</sup> chromosome was revealed by using inverse PCR. Genome DNA was restricted by using RsaI and CfoI (HhaI) enzymes, ligated by T4 DNA Ligase (Roche), amplified, and sequenced. Amplification using primers *piwi* in7 rev GACATAACGGAATTATA-AGGAAT and *piwi* in6 for TATATTGTGGTAACCAG-ATCCAT revealed the insertion site in the first exon before position 105 according to GenBank sequence NG000285.

**Quantitative RT-PCR.** RNA isolation, reverse transcription with oligo-dT primer, and real-time PCR was performed as described previously (8). For each mutant genotype and corresponding heterozygote, three separate RNA samples were prepared. Primers were designed to unique regions of each transposable element type to exclude the amplification of more than one transposon type in one PCR. The following primers were used: CTCACGTTCTGCGAGCGGTCT and CGCTCGAAGGT-TACCAGGTAGGTTT for *Gypsy* transcripts according to sequence (GenBank accession no. AF033821); AACAGAAAC-

GCCAGCAACAGC and CGTTCCCATGTCCGTTGTGAT for *mdg1* transcripts according to sequence (GenBank accession no. X59545); CCTTTGGGAAGCAGGCGTAAA (*GATE s1*) and TCTTCAGACATAGGAGAGCGGC (*GATE as1*) for *Gate* transcripts according to sequence (GenBank accession no. AJ010298); CGCAAAGACATCTGGAGGACTACC and TGCCGACCTGCTTGGTATTG for *HeT-A* transcripts according to sequence (GenBank accession no. U06920); AAT-GCCCTTGTCCGACACGA (*Beagle s1*) and TGATGAAA-CACATTACCAGAACCTTGA (*Beagle as1*) for *HMS-Beagle* transcripts according to sequence (GenBank accession no. AF365402); TGAAATACGGCATACTGCCCCCA and GCT-GATAGGGAGTCGGAGCAGATA for *I* element transcripts according to sequence (GenBank accession no. M14954); CA-GAACAAGTGCCTGAGTCAATCG and GTCCAGTCGTT-TAGCGTATCTCTCG for *G* element transcripts according to sequence (GenBank accession no. X06950), GCATGAGA-GGTTTGGCCATATAAGC (*cop-s*) and GGCCACAGACA-TCTGAGTGTACTACA (*cop-as*), corresponding to GenBank sequence XO4456 for *copia*; TGGAAGTGGGTAGTTCT-GAATGACA (*412 as1*) and AGTTTTTGGTAAATGCAGG-GAATACAA (*412 s1*) for *412* element; AGATCCGGC-AGACATTCAG (*F-element\_s*) and ACTTGACCATGTTTC-CCCC (*F-element\_as*) for *F* element; and CACAGAAA-CCTAAAGACTCCAAATAGCG (*Doc s1*) and GTCAGCGAA-AGCACTGGCTCTT (*Doc as1*) for *Doc* element. As an internal control, we used *Adh* amplified by primers CGGCATCTAA-GAAGTGATACTCCCAAAA and TGAGTGTGCATCGAA-TCAGCCTTATT according to the *Adh* sequence (GenBank accession no. NT033779) and *rp49* amplified by TCCGCCCA-CATACAGGC (*rp49 s2*) and CAATCCTCGTTGGCACT-CACC (*rp49 as2*), corresponding to GenBank sequence Y13939 for *rp49* gene.

**ChIP.** ChIP assay was performed as described previously (8), by using polyclonal rabbit anti-HP1 (PRB-291C; Covance) and polyclonal rabbit antibodies (Upstate): anti-dimethyl-Histone H3 Lys4 (no. 07-030), anti-dimethyl-Histone H3 Lys9 (no. 07-441), and anti-trimethyl-Histone H3 Lys9 (no. 07-523). DNA precipitates were amplified by real-time quantitative PCR. PCR product quantities were normalized to those of the input and relations to a fragment of an intergenic spacer in the 60D region were calculated. Quantities of sample PCR products were calculated using the following expression:  $E(\text{product})^{\text{sample}} * E(60D)^{\text{input}} / E(60D)^{\text{sample}} * E(\text{product})^{\text{input}}$ . The following primers were used for PCR analysis in ChIP: *cop-s/cop-as* (as detailed earlier); *Het-s2/Het-as2* (as detailed earlier); *rp49 s2/ rp49 as2* (as detailed earlier); *Beagle s1/Beagle as1* (as detailed earlier); TTCCCCATCCTCGAGCCCTG (*60ds6*) and CCAGCC-GAGACGAGCACCATAAT (*60das6*), corresponding to the 60D intergenic spacer; *pgd s* AGGACTCGTGGCGCGAGGTG and *pdg as* GGAATGTGTGAACGGGAAAGTGGAG for *pgd* gene; TGAGGAGGCAATGGAAGTTAT (*light s*) and TGAG-CATAGTTGTTTCGTAGGA (*light as*) for *light* gene; *MDG1 dir* AACAGAAACGCCAGCAACAGC and *MDG1 rev* CGTT-CCCATGTCGTTGTGAT for *mdg1*; and *GATE s/GATE as1* (as detailed earlier) and CATCACGTTGTTGCACCGA (*GATE s2*)/GCACTGCCAAGAAGGATAGCTCT (*GATE as2*) for *Gate*.

**Immunohistochemistry and Western Blot.** Ovaries were dissected in PBS solution, fixed in 4% paraformaldehyde in PBS solution at

room temperature (RT) for 1 h, and treated with 50  $\mu\text{g}/\text{mL}$  proteinase K solution (Boehringer) in PBS solution at RT for 5 to 12 min. Further procedures were done as described previously (9). Western blot was performed as described previously (9). The following antibodies were tested for their ability to detect the Piwi<sup>Nt</sup> protein in both immunostaining and Western blotting: rabbit N-terminal and C-terminal anti-PIWI polyclonal antibodies, obtained against 15 C-terminal and 15 N-terminal Piwi amino acids, respectively (10); P4D2 and P3G11 mouse monoclonal antibodies (11) and Abcam rabbit polyclonal antibodies (ab5207) obtained against the peptide corresponding to amino acids 350 to 450 in the Piwi protein sequence. P4D2 antibodies were used for Piwi<sup>Nt</sup> staining experiments. We also used rabbit polyclonal anti-Aub antibodies (10), rabbit anti-lamin B Receptor (Abcam), and monoclonal antibodies provided by the Developmental Studies Hybridoma Bank at the University of Iowa: mouse anti-lamin, rat anti-Vasa, and mouse anti- $\alpha$ -spectrin. Secondary antibodies were Alexa fluor 647-, Alexa fluor 488-, and Alexa fluor 546-conjugated anti-mouse, anti-rabbit, or anti-rat antibodies (Invitrogen). Mouse monoclonal antibodies to  $\beta$ -actin ab8224 (Abcam) or rabbit monoclonal antibodies to  $\gamma$ -tubulin (Sigma) were used as a loading control in Western blotting.

**Short RNA Detection.** [ $\gamma$ -<sup>32</sup>P]dATP-labeled oligonucleotides AG-GACGGAAGCACCGAGTCGCTGC, CATCCACAATTTAT-TTGCCTTTG, and TTG CACATACTGTAATCAAAGG-

CAA complementary to frequently cloned piRNAs (10) were used to detect *TAHRE* and *HeT-A* piRNAs.

**RNA in Situ Hybridization.** PCR product for *HMS-Beagle* sense transcripts detection was amplified using primers TGATGA-AACACATTACCAGAACCTTGA and TAATACGACTCA-CTATAGGGAATGCCCTTGTCTGGACACGA. PCR product for *Gate* sense transcripts detection was obtained using primers CCTTTGGGAAGCAGGCGTAAA and TAATACGACTCA-CTATAGGGTCTTCAGACATAGGAGAGAGCGGC. In case of probes used for confocal microscopy, following hybridization, the sample was blocked during 1 h at RT in 1 $\times$  PBS solution with 0.01% Tween 20 and 0.3% Triton X-100 (PBT-Tr 0.3%) with the addition of goat serum to 3% and hydrogen peroxide to 1%. Then the sample was washed four times for 15 min at RT in PBT-Tr 0.3% and incubated in the same solution with the addition of anti-DIG-POD antibodies (1:500; Roche) for 1 to 2 h at RT or overnight at 4  $^{\circ}\text{C}$ . Then, the sample was washed four times for 15 min at RT in PBT-Tr 0.3% and incubated in the same solution with the addition of 4% tyramide-FAM (0.1 mg/mL stock) for 30 min at RT, after which hydrogen peroxide was added to 0.015% and incubated for another 30 to 40 min. The sample was washed four times for 15 min at RT in PBT-Tr 0.3%, and DNA was stained with DAPI in 1 $\times$  PBS solution for 10 to 20 min. The samples were transferred to SlowFade Gold reagent (Invitrogen). Confocal microscopy was done by using an LSM 510 META system (Zeiss).

1. Lin H, Spradling AC (1997) A novel group of *pumilio* mutations affects the asymmetric division of germline stem cells in the *Drosophila* ovary. *Development* 124:2463–2476.
2. Gillespie DE, Berg CA (1995) *Homeless* is required for RNA localization in *Drosophila* oogenesis and encodes a new member of the DE-H family of RNA-dependent ATPases. *Genes Dev* 9:2495–2508.
3. González-Reyes A, Elliott H, St Johnston D (1997) Oocyte determination and the origin of polarity in *Drosophila*: the role of the *spindle* genes. *Development* 124:4927–4937.
4. Cook HA, Koppetsch BS, Wu J, Theurkauf WE (2004) The *Drosophila* SDE3 homolog *armitage* is required for *oskar* mRNA silencing and embryonic axis specification. *Cell* 116:817–829.
5. Schüpbach T, Wieschaus E (1991) Female sterile mutations on the second chromosome of *Drosophila melanogaster*. II. Mutations blocking oogenesis or altering egg morphology. *Genetics* 129:1119–1136.
6. Clegg NJ, et al. (1997) *maelstrom* is required for an early step in the establishment of *Drosophila* oocyte polarity: posterior localization of *grk* mRNA. *Development* 124:4661–4671.
7. Pane A, Wehr K, Schüpbach T (2007) *zucchini* and *squash* encode two putative nucleases required for rasiRNA production in the *Drosophila* germline. *Dev Cell* 12:851–862.
8. Klenov MS, et al. (2007) Repeat-associated siRNAs cause chromatin silencing of retrotransposons in the *Drosophila melanogaster* germline. *Nucleic Acids Res* 35:5430–5438.
9. Kotelnikov RN, et al. (2009) Peculiarities of piRNA-mediated post-transcriptional silencing of *Stellate* repeats in testes of *Drosophila melanogaster*. *Nucleic Acids Res* 37:3254–3263.
10. Brennecke J, et al. (2007) Discrete small RNA-generating loci as master regulators of transposon activity in *Drosophila*. *Cell* 128:1089–1103.
11. Saito K, et al. (2006) Specific association of Piwi with rasiRNAs derived from retrotransposon and heterochromatic regions in the *Drosophila* genome. *Genes Dev* 20:2214–2222.

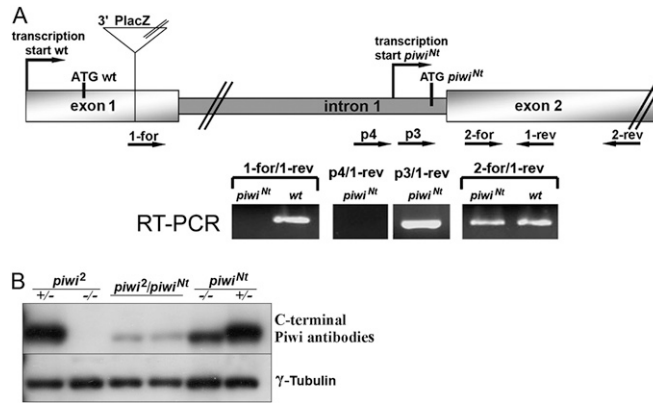

**Fig. S1.** The *piwi*<sup>Nt</sup> mutation leads to formation of N-truncated Piwi protein. (A) As a result of *P lacZ* vector insertion, the mutant *piwi*<sup>Nt</sup> transcript lacks exon 1 sequence, but has a transcription start site in intron 1, approximately 100 bp upstream of the intron 1/exon 2 boundary. Arrows indicate primers used for RT-PCR validation of the transcription start site. (B) Antibodies obtained against C-terminal Piwi amino acids detected shortened Piwi protein in *piwi*<sup>Nt</sup> mutants and *piwi*<sup>Nt</sup>/*piwi*<sup>2</sup> transheterozygotes.

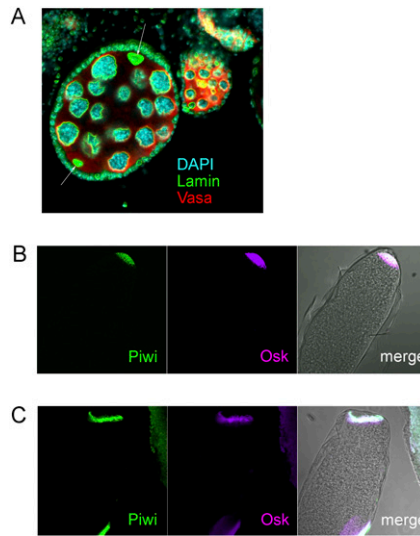

**Fig. S2.** Oocyte position and specification in *piwi*<sup>Nt</sup> mutant. (A) Fused egg chambers, which can be observed in 2% of *piwi*<sup>Nt</sup> ovarioles. Two oocytes are indicated by arrows. (B and C) Mature oocytes (stage 14) of *piwi*<sup>Nt</sup> mutants labeled against Piwi and Oskar (Osk). Both proteins are known to be localized to oocyte posterior, where embryo pole plasm is formed. Approximately 30% of *piwi*<sup>Nt</sup> oocytes (21 of 65) have correctly positioned Piwi and Osk (B). In most cases Osk fails to localize to the posterior pole. (C) An oocyte with two sites of pole plasm formation.

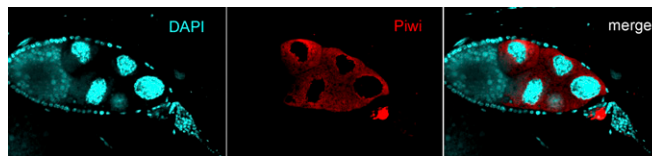

**Fig. S3.** Piwi cytoplasmic localization at stage 10 egg chamber of *piwi*<sup>Nt</sup> mutant.

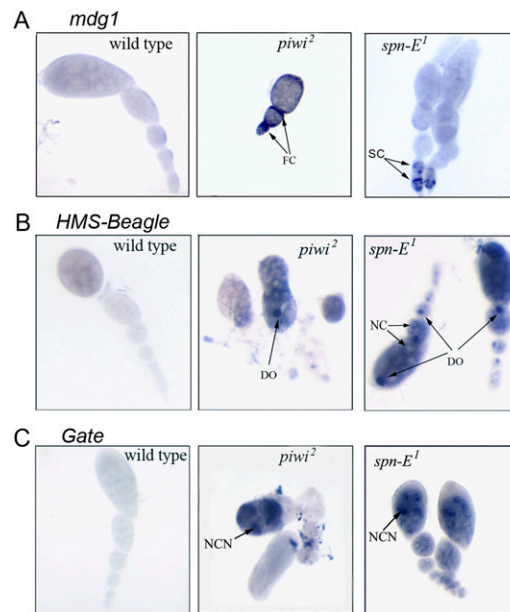

**Fig. 54.** Ovarioles from piRNA mutants stained by phosphatase method with riboprobes to *mdg1*, *HMS-Beagle* and *Gate* transposons. (A) *mdg1* transcripts are detected in somatic follicle cells (FC) in the faulty *piwi*<sup>2</sup> ovaries. The *spn-E*<sup>1</sup> mutation leads to a moderate increase of *mdg1* transcript abundance, predominantly in the somatic cells of the germarium (SC). (B) Transcripts of *HMS-Beagle* are accumulated in the nurse cells (NC) and especially in the developing oocytes (DO) of *piwi*<sup>2</sup> and *spn-E*<sup>1</sup> mutants. (C) RNA of the *Gate* retrotransposon is amassed predominantly in the nurse cell nuclei (NCN) as a result of the *piwi*<sup>2</sup> and *spn-E*<sup>1</sup> mutations.

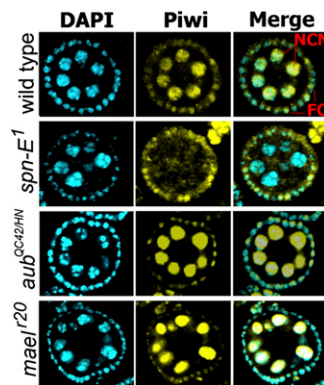

**Fig. 55.** *mael* and *aub* mutations do not prevent Piwi nuclear import. In concert with previous data, the *spn-E* mutation causes partial Piwi delocalization. FC, follicle cells. NCN, nurse cell nuclei.
